# Supplementary material for: Surface and thermal properties of synthesized cationic poly(ethylene oxide) gemini surfactants: the role of the spacer
Source: Royal Society of Chemistry journal article supplement (doi:10.1039/c9ra06577f), 2019-01-01
Supplement: c9ra06577f1.pdf [file c9ra06577f1.pdf]

**Surface and thermal properties of the synthesized cationic poly(ethylene oxide) gemini surfactants: Role of spacer rigidity**

S. M. Shakil Hussain<sup>1</sup>, Muhammad Shahzad Kamal<sup>1</sup>, Theis Solling<sup>1</sup>, Mobeen Murtaza<sup>2</sup>, Lionel Talley Fogang<sup>1</sup>

*<sup>1</sup>Center for Integrative Petroleum Research, King Fahd University of Petroleum & Minerals, Dhahran 31261, Saudi Arabia.*

*<sup>2</sup> College of Petroleum Engineering, King Fahd University of Petroleum & Minerals, Dhahran 31261, Saudi Arabia*

**Corresponding Author: Dr. Muhammad Shahzad Kamal**

Email: [shahzadmalik@kfupm.edu.sa](mailto:shahzadmalik@kfupm.edu.sa)

Telephone: +966 13 860 8513

Fax: +966 13 860 3989

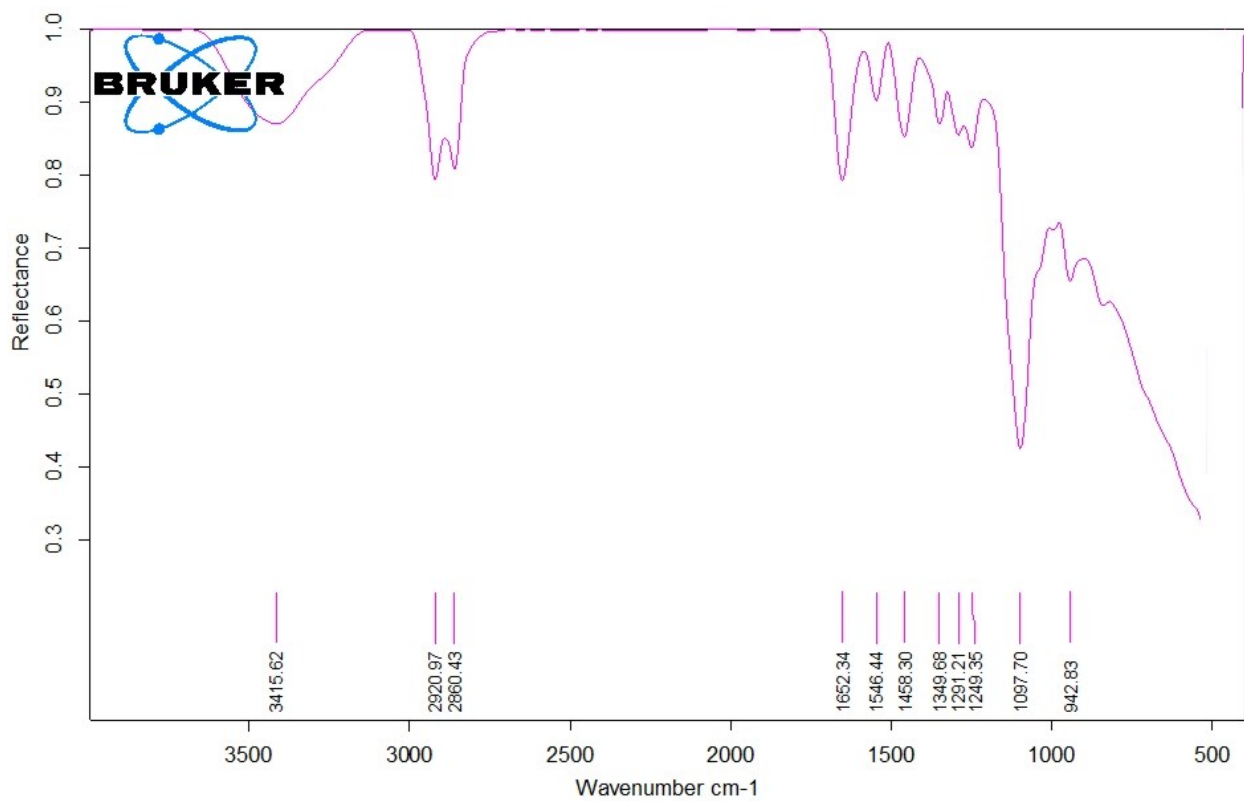

**Fig. S1.** FT-IR spectrum of cationic poly(ethylene oxide) gemini surfactant (**GS1**)

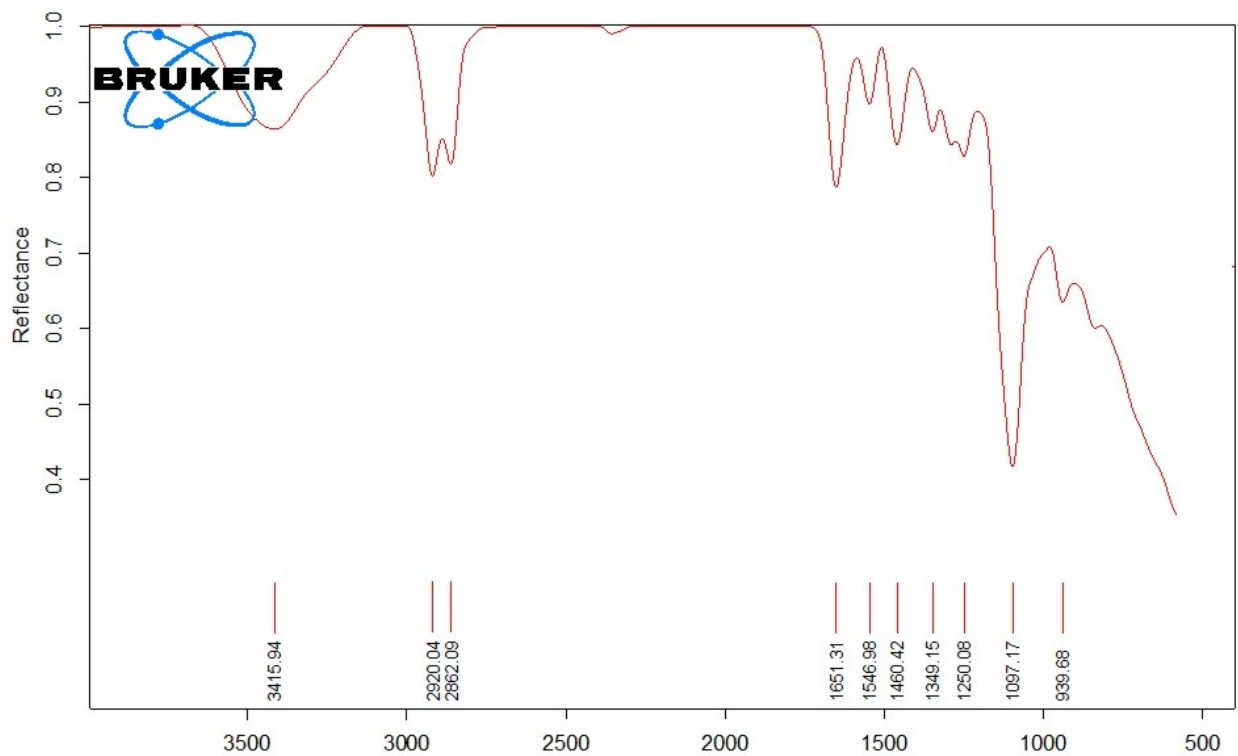

**Fig. S2.** FT-IR spectrum of cationic poly(ethylene oxide) gemini surfactant (**GS2**)

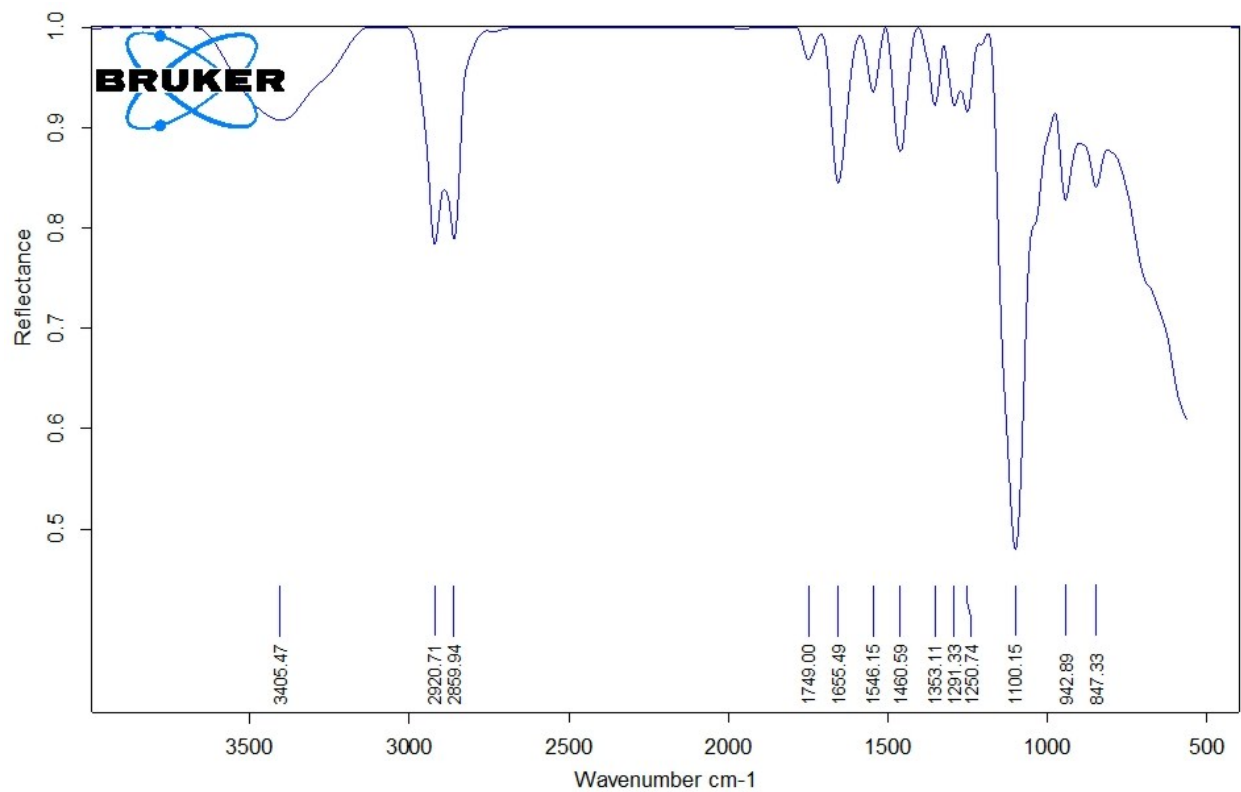

**Fig. S3.** FT-IR spectrum of cationic poly(ethylene oxide) gemini surfactant (GS3)

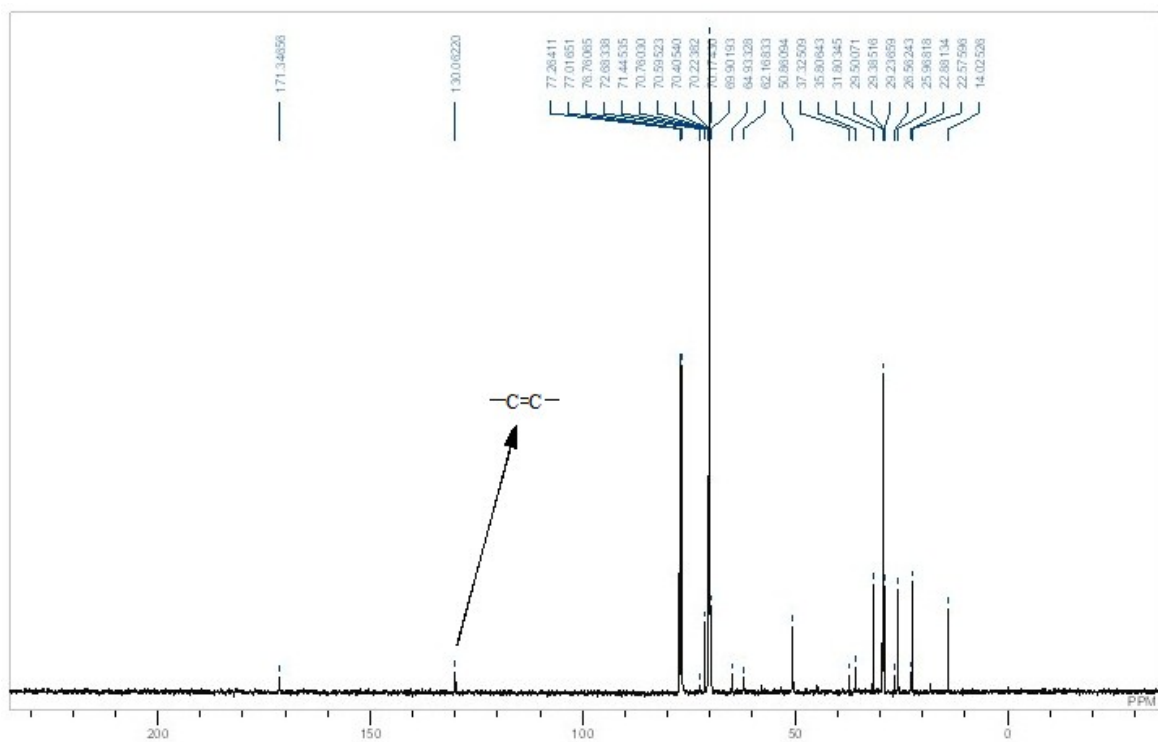

**Fig. S4.**  $^{13}\text{C}$ -NMR of cationic poly(ethylene oxide) gemini surfactant (GS2)

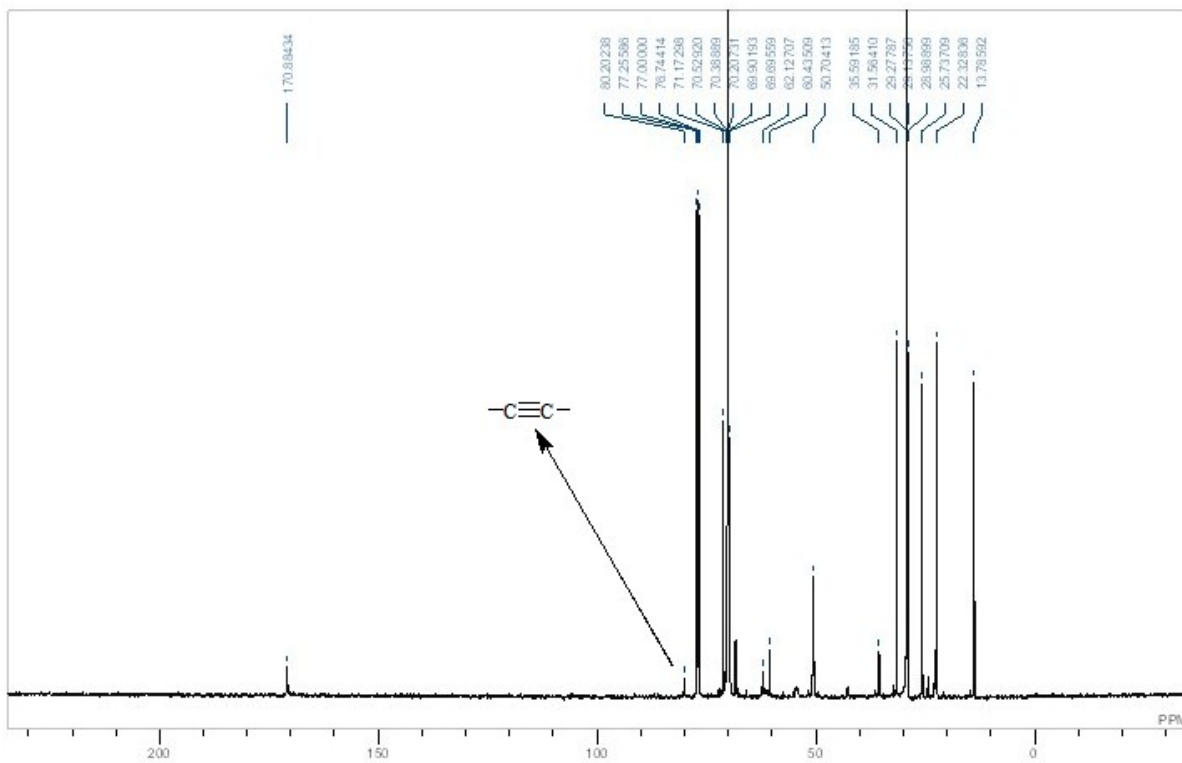

**Fig. S5.**  $^{13}\text{C}$ -NMR of cationic poly(ethylene oxide) gemini surfactant (GS3)

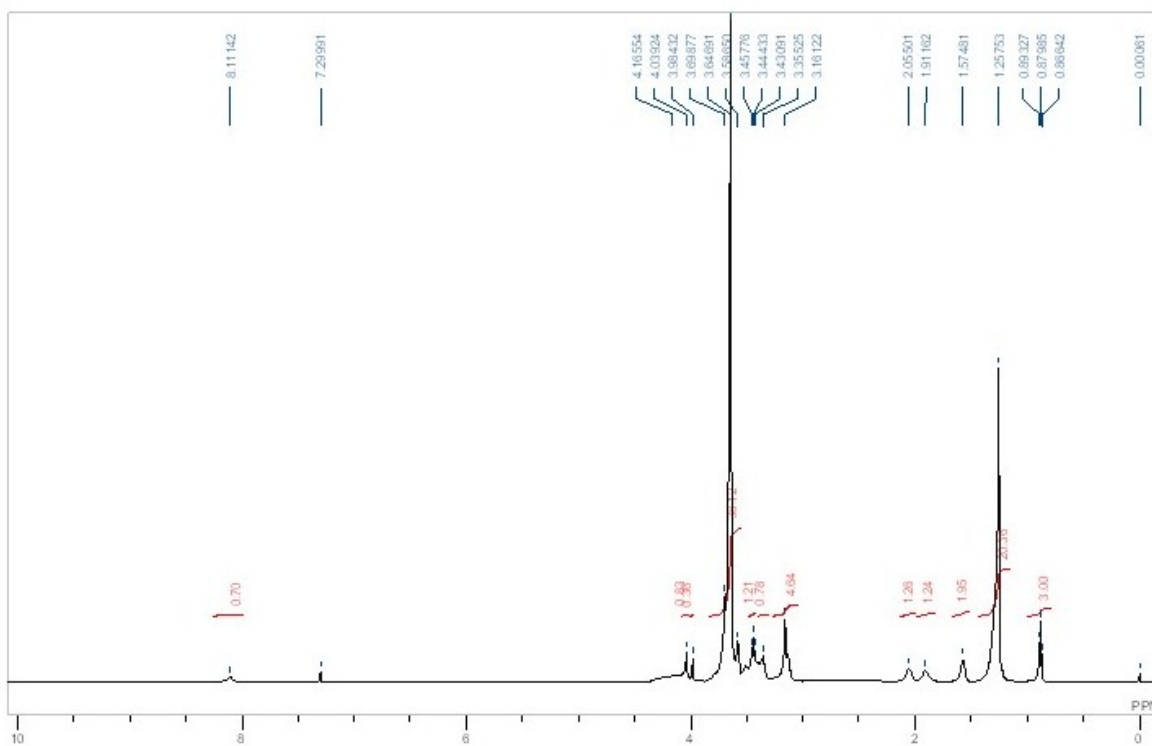

**Fig. S6.**  $^1\text{H}$ -NMR of cationic poly(ethylene oxide) gemini surfactant (GS1)
